# Supplementary material
Source: Research Square preprint supplement (doi:10.21203/rs.3.rs-9638320/v1)
Supplement: Supplementary file 1 [file ae7b91b8d6de88857187b56a.docx]

**Table S1.** The sequence number and coverage of 68 samples.

| No. | group | Sequence number | Goods' coverage (%) |
| --- | --- | --- | --- |
| 1 | obese | 32681 | 100 |
| 2 | obese | 34215 | 100 |
| 3 | obese | 36199 | 100 |
| 4 | obese | 37021 | 99.99729883 |
| 5 | obese | 6903 | 100 |
| 6 | obese | 5304 | 100 |
| 7 | obese | 45609 | 100 |
| 8 | obese | 21712 | 100 |
| 9 | obese | 28666 | 100 |
| 10 | obese | 29192 | 100 |
| 11 | obese | 24202 | 100 |
| 12 | obese | 27627 | 100 |
| 13 | obese | 11843 | 100 |
| 14 | obese | 26415 | 100 |
| 15 | obese | 25331 | 100 |
| 16 | obese | 26226 | 100 |
| 17 | obese | 26188 | 100 |
| 18 | obese | 22154 | 100 |
| 19 | obesity-PP comorbid | 7767 | 100 |
| 20 | obesity-PP comorbid | 3841 | 100 |
| 21 | obesity-PP comorbid | 6422 | 100 |
| 22 | obesity-PP comorbid | 7946 | 100 |
| 23 | obesity-PP comorbid | 6307 | 99.9841446 |
| 24 | obesity-PP comorbid | 8148 | 100 |
| 25 | obesity-PP comorbid | 7674 | 100 |
| 26 | normal | 6874 | 100 |
| 27 | normal | 7732 | 100 |
| 28 | normal | 5971 | 99.98325239 |
| 29 | normal | 6644 | 99.98494883 |
| 30 | normal | 6678 | 100 |
| 31 | normal | 5823 | 100 |
| 32 | normal | 9420 | 100 |
| 33 | normal | 8120 | 100 |
| 34 | normal | 5794 | 100 |
| 35 | normal | 4388 | 100 |
| 36 | normal | 3995 | 100 |
| 37 | normal | 7933 | 100 |
| 38 | normal | 6129 | 100 |
| 39 | normal | 5006 | 100 |
| 40 | normal | 7979 | 100 |
| 41 | normal | 3533 | 100 |
| 42 | normal | 5357 | 100 |
| 43 | normal | 4840 | 100 |
| 44 | precocious | 7633 | 100 |
| 45 | precocious | 5783 | 100 |
| 46 | precocious | 4742 | 99.97891185 |
| 47 | precocious | 5222 | 100 |
| 48 | precocious | 6054 | 100 |
| 49 | precocious | 7287 | 100 |
| 50 | precocious | 4139 | 100 |
| 51 | precocious | 10578 | 100 |
| 52 | precocious | 5375 | 100 |
| 53 | precocious | 7900 | 100 |
| 54 | precocious | 7024 | 100 |
| 55 | precocious | 5092 | 100 |
| 56 | precocious | 5642 | 100 |
| 57 | precocious | 7151 | 100 |
| 58 | precocious | 7506 | 100 |
| 59 | precocious | 7286 | 100 |
| 60 | precocious | 8998 | 100 |
| 61 | precocious | 5656 | 100 |
| 62 | precocious | 8684 | 100 |
| 63 | precocious | 6439 | 100 |
| 64 | precocious | 8203 | 100 |
| 65 | precocious | 6259 | 100 |
| 66 | precocious | 6121 | 100 |
| 67 | precocious | 3996 | 100 |
| 68 | precocious | 5454 | 100 |
